# Supplementary material
Source: Royal Society of Chemistry journal article supplement (doi:10.1039/d6cp00779a)
Supplement: d6cp00779a2.pdf [file d6cp00779a2.pdf]

**Supplemental Information: Electronic and structural properties  
of V<sub>2</sub>O<sub>5</sub> layered polymorphs**

Sakthi Kasthuriangan<sup>1</sup> and Hartwin Peelaers<sup>1</sup>

<sup>1</sup>*Department of Physics and Astronomy,  
University of Kansas, Lawrence, KS 66045, USA\**

TABLE S1. Lattice parameters and percentage deviations for the  $\alpha$  and  $\beta$  polymorphs using different van der Waals; interactions.

| polymorph | a (Å)                  | b (Å)  | c (Å) | $\beta$ (deg.) | $\Delta$ a (%) | $\Delta$ b (%) | $\Delta$ c (%) | $\Delta$ $\beta$ (%) |       |
|-----------|------------------------|--------|-------|----------------|----------------|----------------|----------------|----------------------|-------|
| $\alpha$  | experimental (Ref. 66) | 11.512 | 3.564 | 4.368*         |                |                |                |                      |       |
|           | HSE06                  | 11.362 | 3.545 | 4.689*         | -1.30          | -0.53          | 7.35*          |                      |       |
|           | HSE-D2                 | 11.438 | 3.512 | 4.415*         | -0.64          | -1.46          | 1.08*          |                      |       |
|           | HSE-D3+damping         | 11.428 | 3.527 | 4.331*         | -0.73          | -1.04          | -0.86*         |                      |       |
|           | HSE-D3                 | 11.434 | 3.532 | 4.363*         | -0.67          | -0.90          | -0.11*         |                      |       |
|           | HSE-D4                 | 11.431 | 3.527 | 4.359*         | -0.70          | -1.04          | -0.21*         |                      |       |
|           | HSE-TS                 | 11.448 | 3.521 | 4.347*         | -0.56          | -1.19          | -0.49*         |                      |       |
|           | HSE-TSH                | 11.458 | 3.518 | 4.337*         | -0.47          | -1.30          | -0.71*         |                      |       |
|           | HSE-rVV10              | 11.479 | 3.528 | 4.215*         | -0.29          | -1.01          | -3.51*         |                      |       |
|           | HSE-rVV10L             | 11.450 | 3.533 | 4.339*         | -0.53          | -0.86          | -0.66*         |                      |       |
| $\beta$   | experimental (Ref. 39) | 7.112* | 3.579 | 6.290          | 90.15          |                |                |                      |       |
|           | HSE06                  | 7.863* | 3.539 | 6.278          | 91.14          | 10.56*         | -1.13          | -0.19                | 1.10  |
|           | HSE-D2                 | 7.092* | 3.526 | 6.237          | 90.48          | -0.28*         | -1.49          | -0.85                | 0.37  |
|           | HSE-D3+damping         | 7.079* | 3.535 | 6.231          | 90.40          | -0.46*         | -1.24          | -0.95                | 0.27  |
|           | HSE-D3                 | 7.119* | 3.529 | 6.261          | 90.39          | 0.10*          | -1.41          | -0.47                | 0.27  |
|           | HSE-D4                 | 7.149* | 3.523 | 6.245          | 90.28          | 0.52*          | -1.57          | -0.73                | 0.15  |
|           | HSE-TS                 | 7.066* | 3.530 | 6.249          | 90.07          | -0.64*         | -1.38          | -0.65                | -0.08 |
|           | HSE-TSH                | 7.145* | 3.529 | 6.236          | 90.11          | 0.47*          | -1.41          | -0.86                | -0.05 |
|           | HSE-rVV10              | 6.990* | 3.533 | 6.213          | 90.428         | -1.71*         | -1.30          | -1.22                | 0.31  |
|           | HSE-rVV10L             | 7.153* | 3.532 | 6.250          | 90.385         | 0.57*          | -1.31          | -0.65                | 0.26  |

## I. LATTICE CONSTANTS

This section has tables, S1 and S2, detailing the lattice constants of the  $\alpha$ ,  $\beta$  and non-layered B polymorphs as obtained with HSE06 in combination with various approaches to include van der Waals interactions.

## II. UNINTERCALATED BANDSTRUCTURES

Bandstructures of the unintercalated layered polymorphs of  $V_2O_5$  are shown in Figs. S1-S8. The color scale indicates the bands' orbital character, where red indicates vanadium and blue oxygen character. All band structures were calculated with HSE06 with Grimme D3 to describe the van der Waals interactions, as described in the main manuscript.

## III. LI BANDSTRUCTURES

Bandstructures of the Li intercalated  $\alpha$  and  $\epsilon$ - $Cu_{0.85}$  polymorphs (Fig S9-12) at two concentrations described in their captions. Dark grey bands are V-character, light grey bands are O-character, and red bands are Li-character.

## IV. MG BANDSTRUCTURES

Bandstructures of the Mg intercalated  $\alpha$  and  $\epsilon$ - $Cu_{0.85}$  polymorphs (Fig. S13-14). Dark grey bands are V-character, light grey bands are O-character, and green bands are Mg-character. The dashed and solid lines represent the two spins.

## V. K BANDSTRUCTURES

Bandstructures of the K intercalated  $\alpha$  and  $\epsilon$ - $Cu_{0.85}$  polymorphs (Fig. S15-16). Dark grey bands are V-character, light grey bands are O-character, and blue bands are K-character. The dashed and solid lines represent the two spins.

## VI. ZN BANDSTRUCTURES

Bandstructures of the Zn intercalated  $\alpha$  and  $\epsilon$ - $Cu_{0.85}$  polymorphs (Fig. S17-18). Dark grey bands are V-character, light grey bands are O-character, and bright purple bands are Zn-character. The dashed and solid lines represent the two spins.

TABLE S2. Lattice parameters and percentage deviations for the B polymorph using different van der Waals interactions.

| polymorph              | a (Å)          | b (Å)  | c (Å) | $\beta$ (deg.) | $\Delta a$ (%) | $\Delta b$ (%) | $\Delta c$ (%) | $\Delta \beta$ (%) |       |
|------------------------|----------------|--------|-------|----------------|----------------|----------------|----------------|--------------------|-------|
| experimental (Ref. 39) | 11.972         | 4.702  | 5.325 | 104.41         |                |                |                |                    |       |
| HSE06                  | 11.801         | 4.644  | 5.361 | 103.60         | -1.43          | -1.24          | 0.68           | -0.78              |       |
| HSE-D2                 | 11.761         | 4.619  | 5.296 | 104.20         | -1.77          | -1.78          | -0.54          | -0.20              |       |
| B<br>(nonlayered)      | HSE-D3+damping | 11.766 | 4.613 | 5.284          | 104.06         | -1.72          | -1.90          | -0.78              | -0.33 |
| HSE-D3                 | 11.807         | 4.626  | 5.333 | 103.97         | -1.38          | -1.61          | 0.14           | -0.42              |       |
| HSE-D4                 | 11.544         | 4.673  | 5.305 | 105.28         | -3.57          | -0.61          | -0.38          | 0.83               |       |
| HSE-TS                 | 11.798         | 4.603  | 5.293 | 103.92         | -1.46          | -2.10          | -0.60          | -0.47              |       |
| HSE-TSH                | 11.770         | 4.611  | 5.284 | 103.95         | -1.68          | -1.94          | -0.78          | -0.45              |       |
| HSE-rVV10              | 11.768         | 4.605  | 5.256 | 104.23         | -1.70          | -2.06          | -1.30          | -0.17              |       |
| HSE-rVV10L             | 11.784         | 4.623  | 5.302 | 103.94         | -1.57          | -1.68          | -0.43          | -0.45              |       |

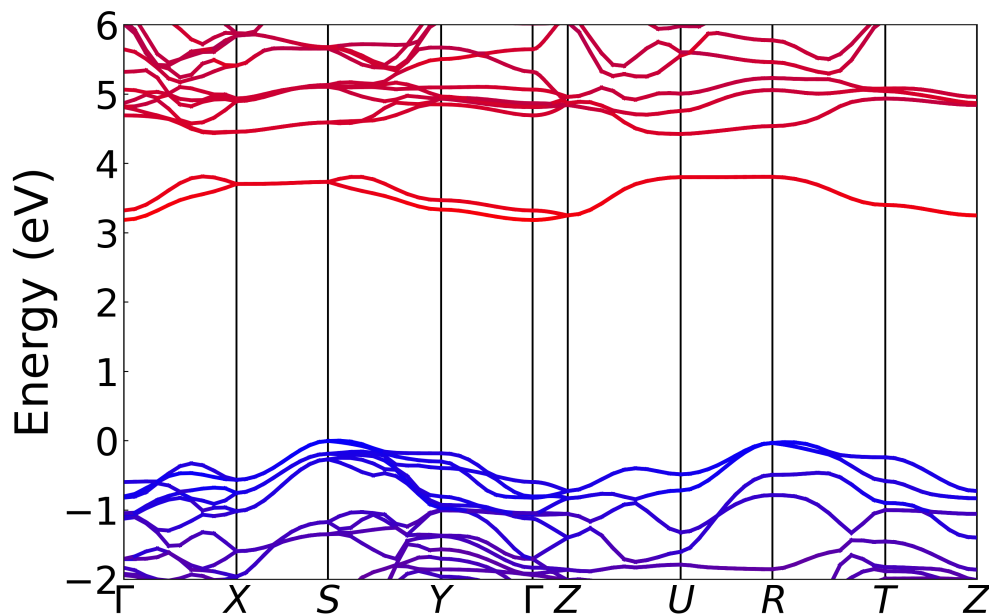

Fig. S1. Calculated bandstructure for the  $\alpha$  polymorph (delithiated  $\text{Li}_x\text{V}_2\text{O}_5$  for  $0 < x < 0.1$ ).

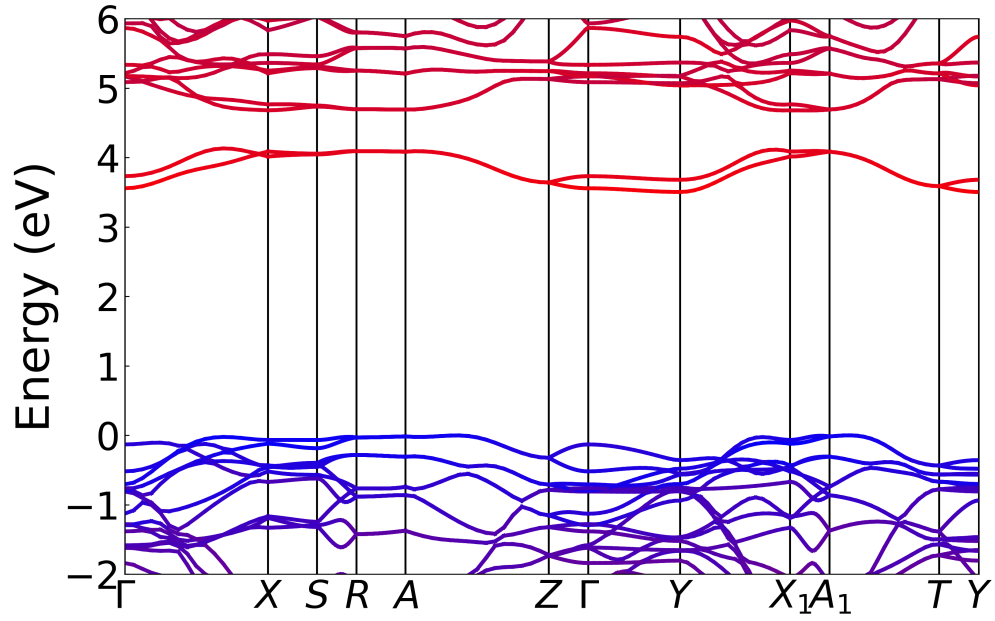

Fig. S2. Calculated bandstructure for the  $\delta$  polymorph (delithiated  $\text{Li}_x\text{V}_2\text{O}_5$  for  $0.7 < x < 1$ ).

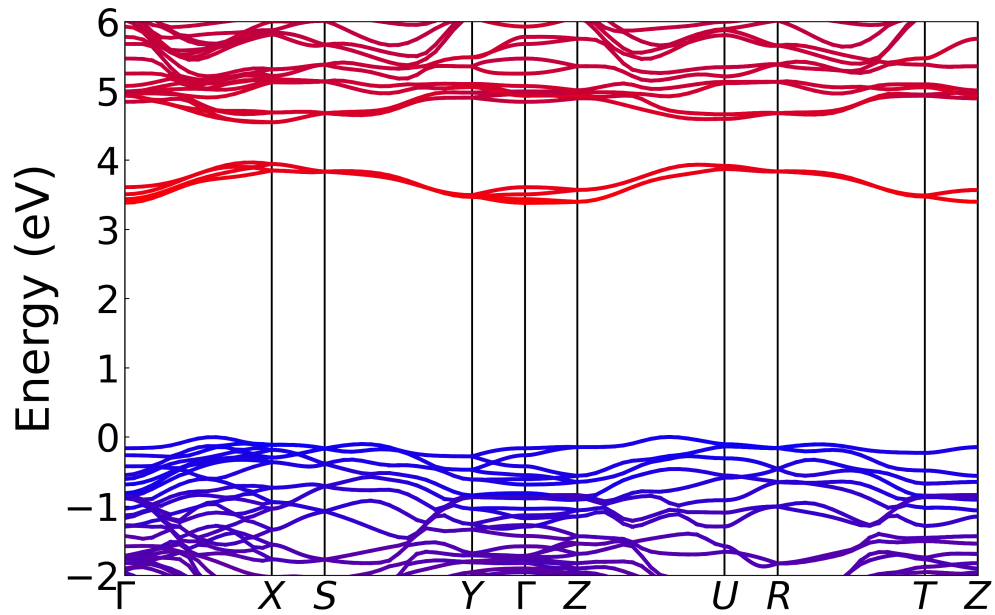

Fig. S3. Calculated bandstructure for the  $\gamma$  polymorph (delithiated  $\text{Li}_x\text{V}_2\text{O}_5$  for  $1 < x < 2$ ).

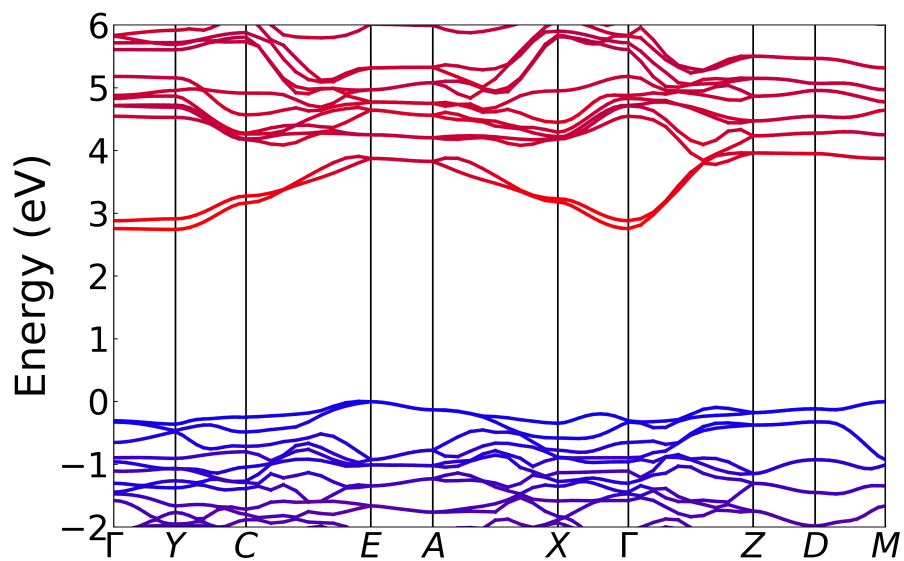

Fig. S4. Calculated bandstructure for the  $\beta$  polymorph (a high temperature and high pressure polymorph of  $V_2O_5$ ).

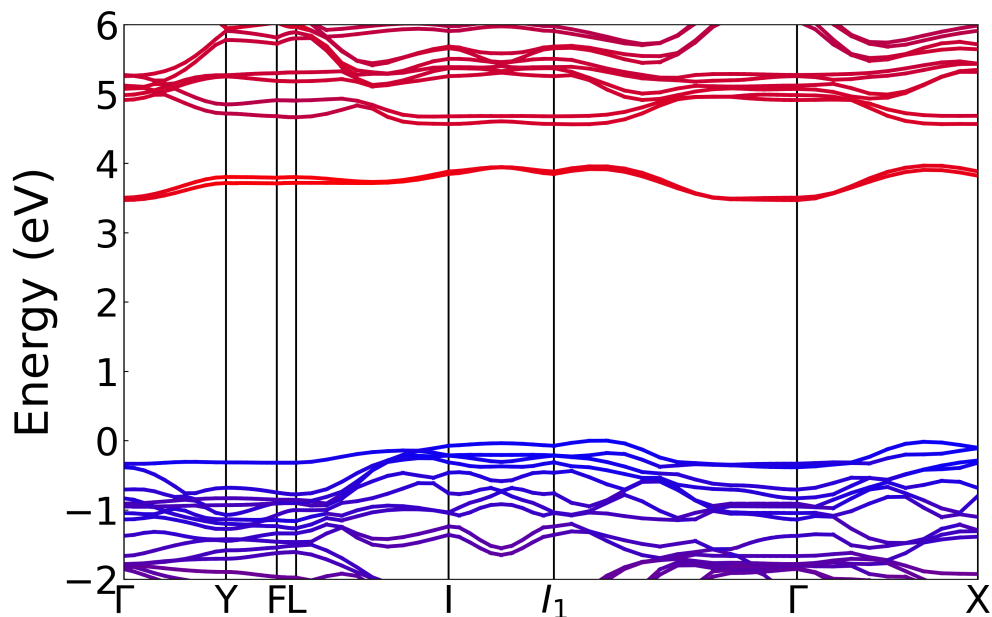

Fig. S5. Calculated bandstructure for the double-layer  $\delta$ - $Ag_{0.84}$  polymorph (unintercalated  $Ag_{0.84}V_2O_5$ ).

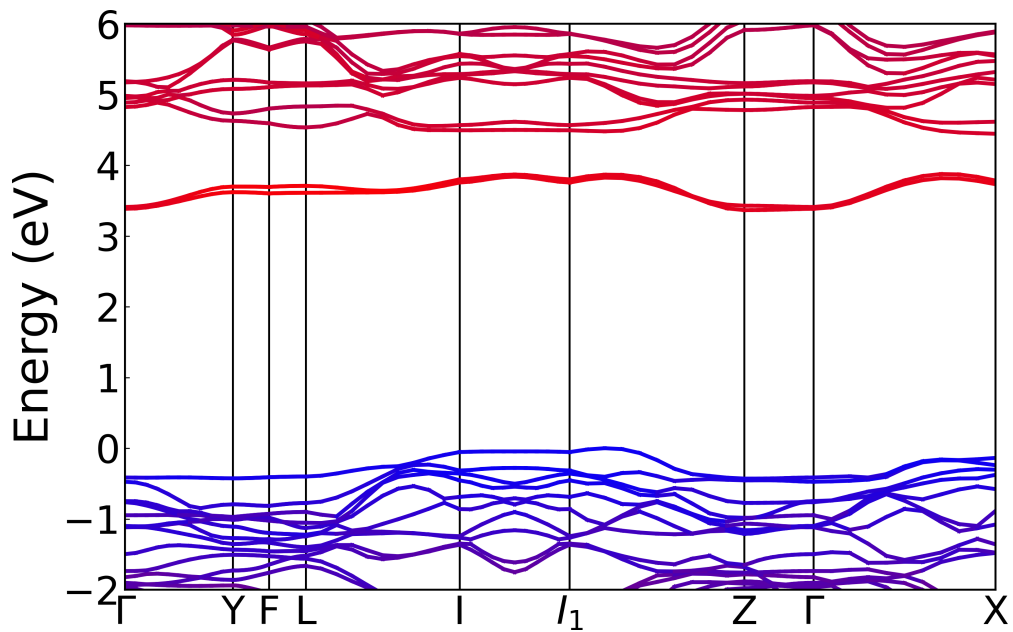

Fig. S6. Calculated bandstructure for the double-layer  $\epsilon\text{-Cu}_{0.85}$  polymorph (unintercalated  $\text{Cu}_{0.85}\text{V}_2\text{O}_5$ ).

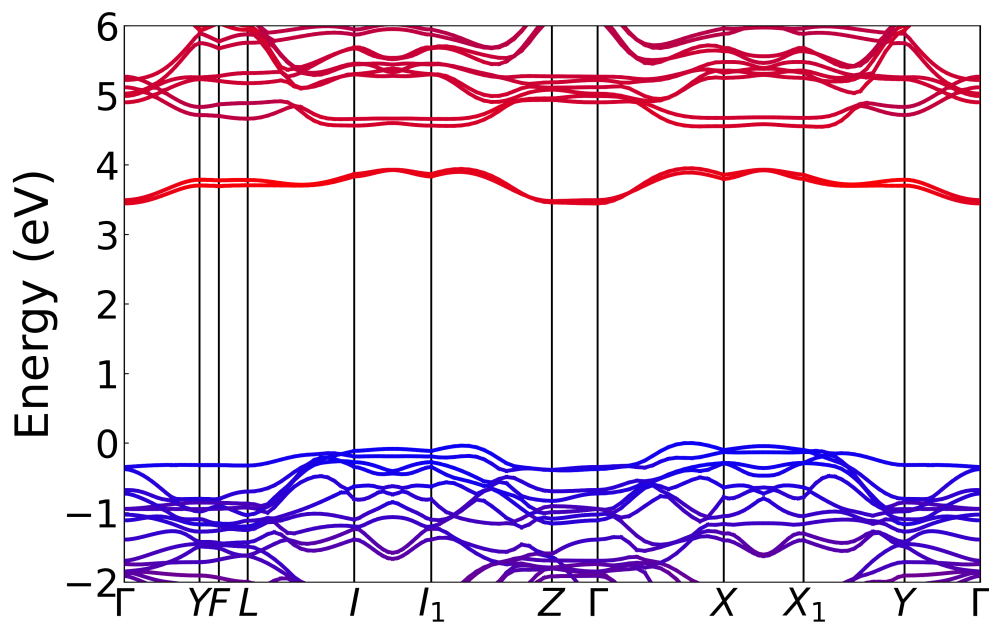

Fig. S7. Calculated bandstructure for the double-layer  $\nu\text{-Ca}_{0.6}$  polymorph (unintercalated  $\text{Ca}_{0.6}\text{V}_2\text{O}_5$ ).

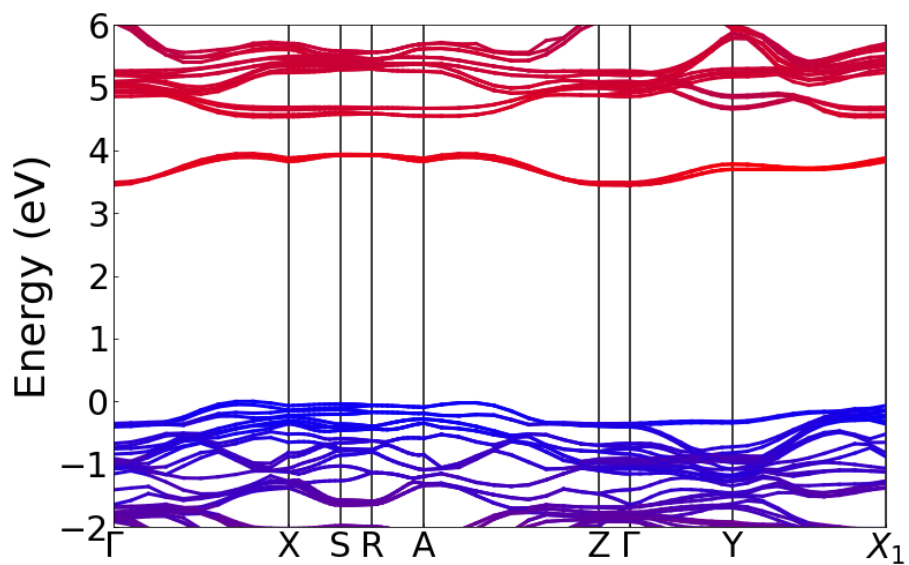

Fig. S8. Calculated bandstructure for the double-layer  $\rho$ - $K_{0.5}$  polymorph (unintercalated  $K_{0.5}V_2O_5$ ).

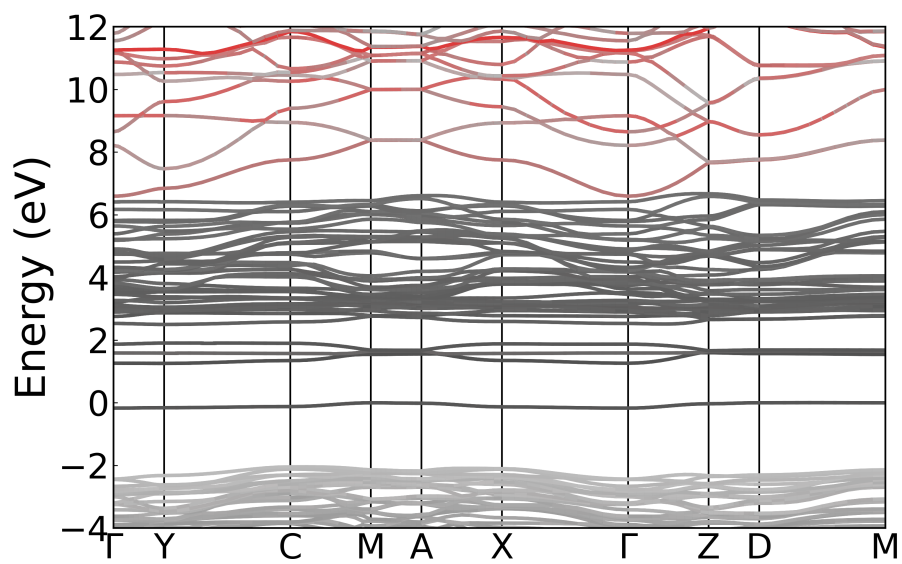

Fig. S9. Calculated bandstructure of  $\alpha$ - $Li_{0.5}V_2O_5$  with AFM ordering.

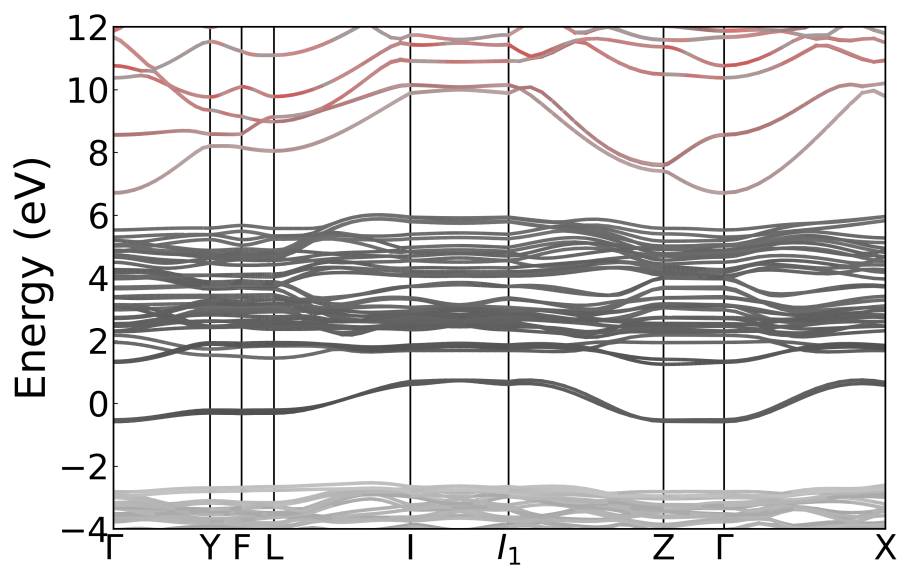

Fig. S10. Calculated bandstructure of  $\text{Li}_{0.5}\text{V}_2\text{O}_5$  in the  $\epsilon\text{-Cu}_{0.85}$  polymorph.

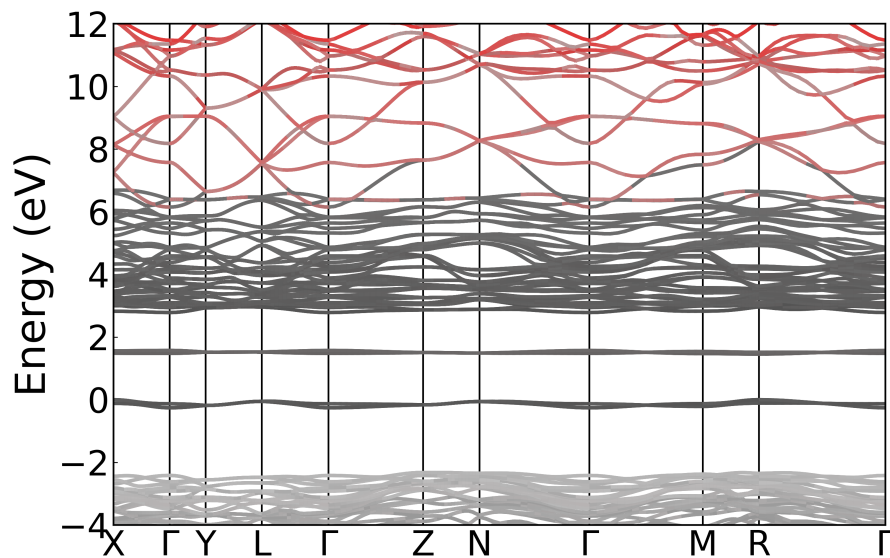

Fig. S11. Calculated bandstructure of  $\alpha\text{-Li}_1\text{V}_2\text{O}_5$  with AFM ordering.

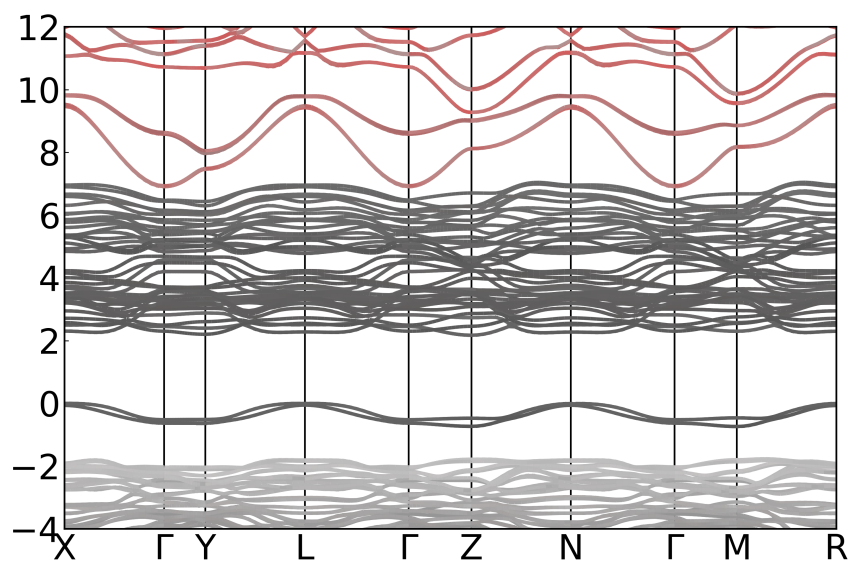

Fig. S12. Calculated bandstructure of  $\text{Li}_1\text{V}_2\text{O}_5$  in the  $\epsilon\text{-Cu}_{0.85}$  polymorph.

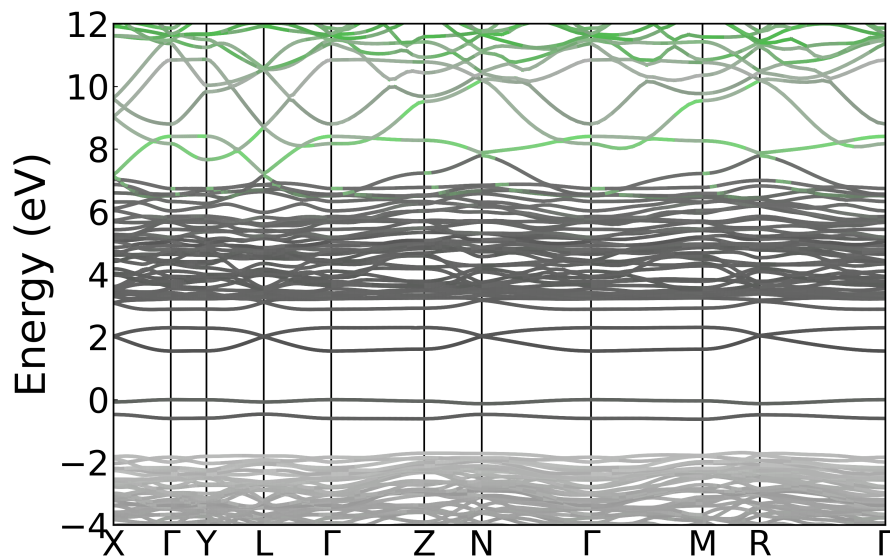

Fig. S13. Calculated bandstructure of  $\alpha\text{-Mg}_{0.5}\text{V}_2\text{O}_5$  with AFM ordering.

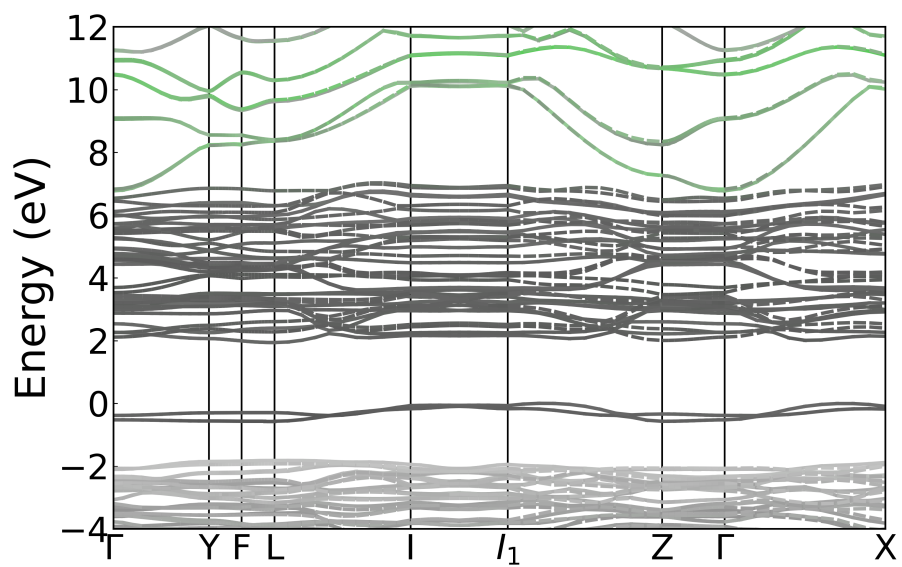

Fig. S14. Calculated bandstructure of  $\text{Mg}_{0.5}\text{V}_2\text{O}_5$  in the  $\epsilon\text{-Cu}_{0.85}$  polymorph.

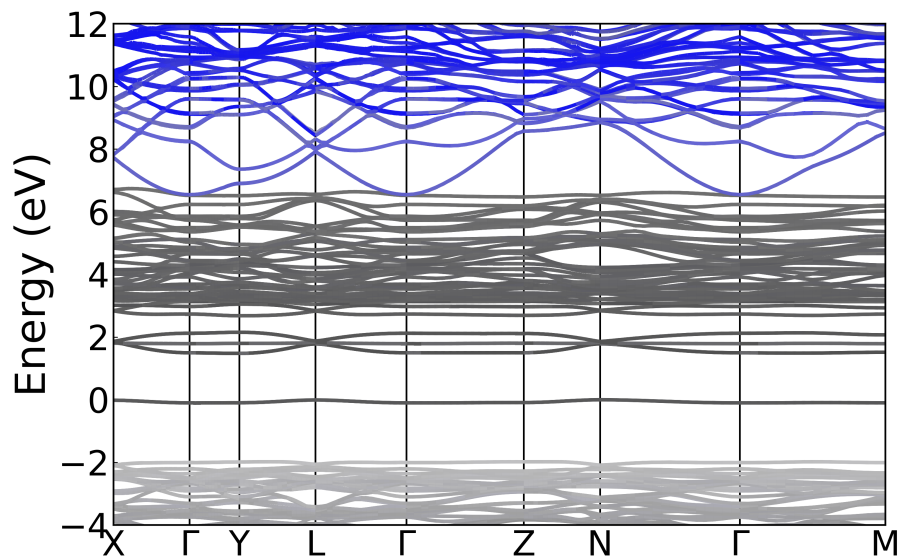

Fig. S15. Calculated bandstructure for the  $\alpha\text{-K}_{0.5}\text{V}_2\text{O}_5$  polymorph with AFM ordering.

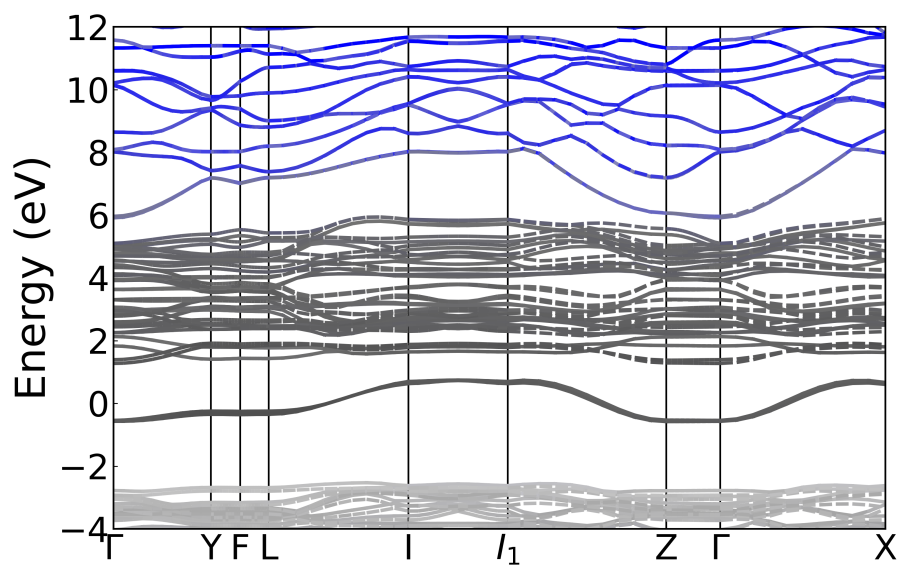

Fig. S16. Calculated bandstructure for  $K_{0.5}V_2O_5$  in the  $\epsilon$ - $Cu_{0.85}$  polymorph.

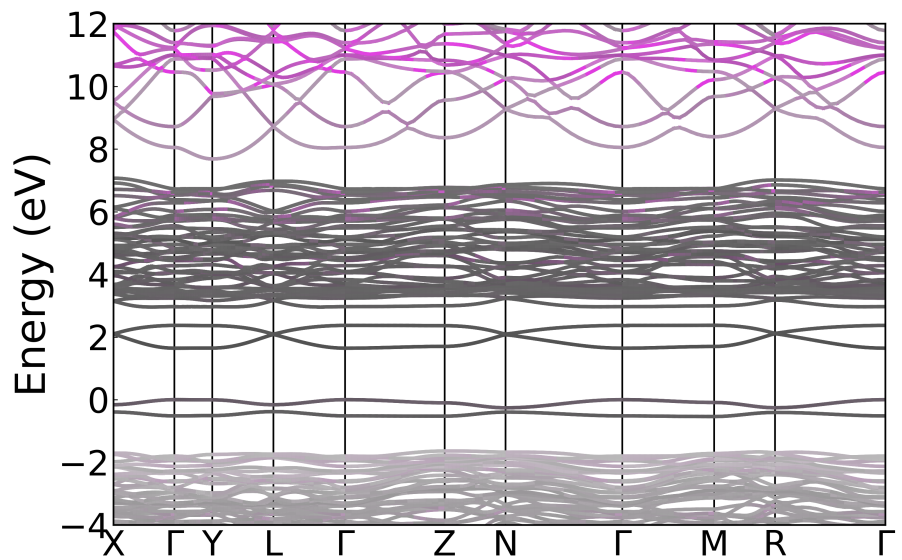

Fig. S17. Calculated bandstructure for the  $\alpha$ - $Zn_{0.5}V_2O_5$  polymorph with AFM ordering.

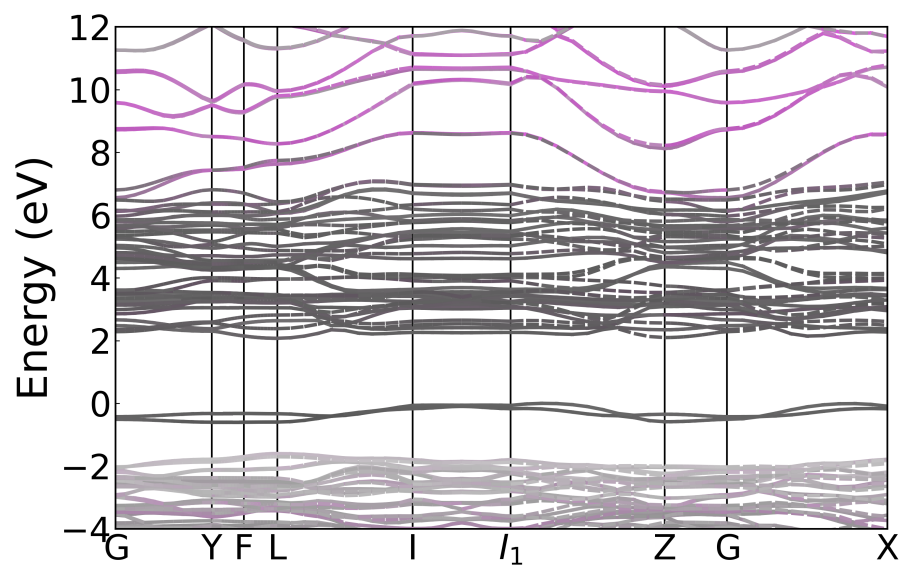

Fig. S18. Calculated bandstructure for  $\text{Zn}_{0.5}\text{V}_2\text{O}_5$  in the  $\epsilon\text{-Cu}_{0.85}$  polymorph.
